# Supplementary material for: Merging of cationic RAFT and radical RAFT polymerizations with ring-opening polymerizations for the synthesis of asymmetric ABCD type tetrablock copolymers in one pot
Source: Royal Society of Chemistry journal article supplement (doi:10.1039/d1py00971k), 2021-01-01
Supplement: d1py00971k1.pdf [file d1py00971k1.pdf]

## Supporting Information

### **Merging of cationic RAFT and radical RAFT polymerizations with ring-opening polymerizations for the synthesis of asymmetric ABCD type tetrablock copolymers in one-pot**

Yuejia Zhu, Luoyu Gao, Zhenjiang Li\*, Bo Liu, Zhihao Zhang, Haoying Tong, Yuanyuan Qu, Yusheng Quan, Xin Zou, Kai Guo\*

*State Key Laboratory Materials-Oriented Chemical Engineering, College of Biotechnology and Pharmaceutical Engineering, Nanjing Tech University, 30 Puzhu Road South, Nanjing 211816, China.*

*E-mail: guok@njtech.edu.cn, zjli@njtech.edu.cn; Tel: +86 25 5813 9926*

#### **Contents**

|                                                                                                                              |    |
|------------------------------------------------------------------------------------------------------------------------------|----|
| Figure S1. <sup>1</sup> H NMR spectrum (DMSO, 400 MHz) of PTRA                                                               | S1 |
| Figure S2. <sup>13</sup> C NMR spectrum (DMSO, 100 MHz) of PTRA                                                              | S2 |
| Figure S3. <sup>1</sup> H NMR spectrum (CDCl <sub>3</sub> , 400 MHz) of PIBVE                                                | S3 |
| Figure S4. <sup>1</sup> H NMR spectrum (CDCl <sub>3</sub> , 400 MHz) of PIBVE- <i>b</i> -PMMA                                | S4 |
| Figure S5. <sup>1</sup> H NMR spectrum (CDCl <sub>3</sub> , 400 MHz) of deprotected PIBVE- <i>b</i> -PMMA                    | S5 |
| Figure S6. <sup>1</sup> H NMR spectrum (CDCl <sub>3</sub> , 400 MHz) of PIBVE- <i>b</i> -PMMA- <i>b</i> -PVL                 | S6 |
| Figure S7. <sup>1</sup> H NMR spectrum (CDCl <sub>3</sub> , 400 MHz) of PIBVE- <i>b</i> -PMMA- <i>b</i> -PVL- <i>b</i> -PLLA | S7 |
| Figure S8. <sup>1</sup> H NMR spectrum (CDCl <sub>3</sub> , 400 MHz) of PBVE                                                 | S8 |
| Figure S9. <sup>1</sup> H NMR spectrum (CDCl <sub>3</sub> , 400 MHz) of poly(4-methoxystyrene)                               | S9 |

|                                                                                                               |     |
|---------------------------------------------------------------------------------------------------------------|-----|
| Figure S10. $^1\text{H}$ NMR spectrum ( $\text{CDCl}_3$ , 400 MHz) of PLA.                                    | S10 |
| Figure S11. $^1\text{H}$ NMR spectrum ( $\text{CDCl}_3$ , 400 MHz) of PCL.                                    | S11 |
| Figure S12. $^1\text{H}$ NMR spectrum ( $\text{CDCl}_3$ , 400 MHz) of PVL.                                    | S12 |
| Figure S13. Merging of cationic RAFT polymerization and ROP for preparing<br>PIBVE- <i>b</i> -PLLA            | S13 |
| Figure S14. Merging of radical RAFT polymerization and ROP for preparing<br>PMMA- <i>b</i> -PLLA              | S14 |
| Figure S15. SEC traces of PIBVE                                                                               | S15 |
| Figure S16. SEC traces of PIBVE- <i>b</i> -PMMA                                                               | S16 |
| Figure S17. SEC traces of PIBVE- <i>b</i> -PMMA- <i>b</i> -PVL                                                | S17 |
| Figure S18. SEC traces of PIBVE- <i>b</i> -PMMA- <i>b</i> -PVL- <i>b</i> -PLA                                 | S18 |
| Figure S19. SEC traces of PIBVE- <i>b</i> -PLA                                                                | S19 |
| Figure S20. SEC traces of PMMA - <i>b</i> -PLA                                                                | S20 |
| Figure S21. SEC traces of chain extension                                                                     | S21 |
| Figure S22. Kinetic research on cationic RAFT polymerization of IBVE and<br>ring-opening polymerization of LA | S22 |
| Figure S23. DOSY NMR spectrum ( $\text{CDCl}_3$ ) of PIBVE- <i>b</i> -PMMA- <i>b</i> -PVL- <i>b</i> -PLLA.    | S23 |
| Table S1. The effect of TABF and chlorosilane on the ROPs                                                     | S24 |

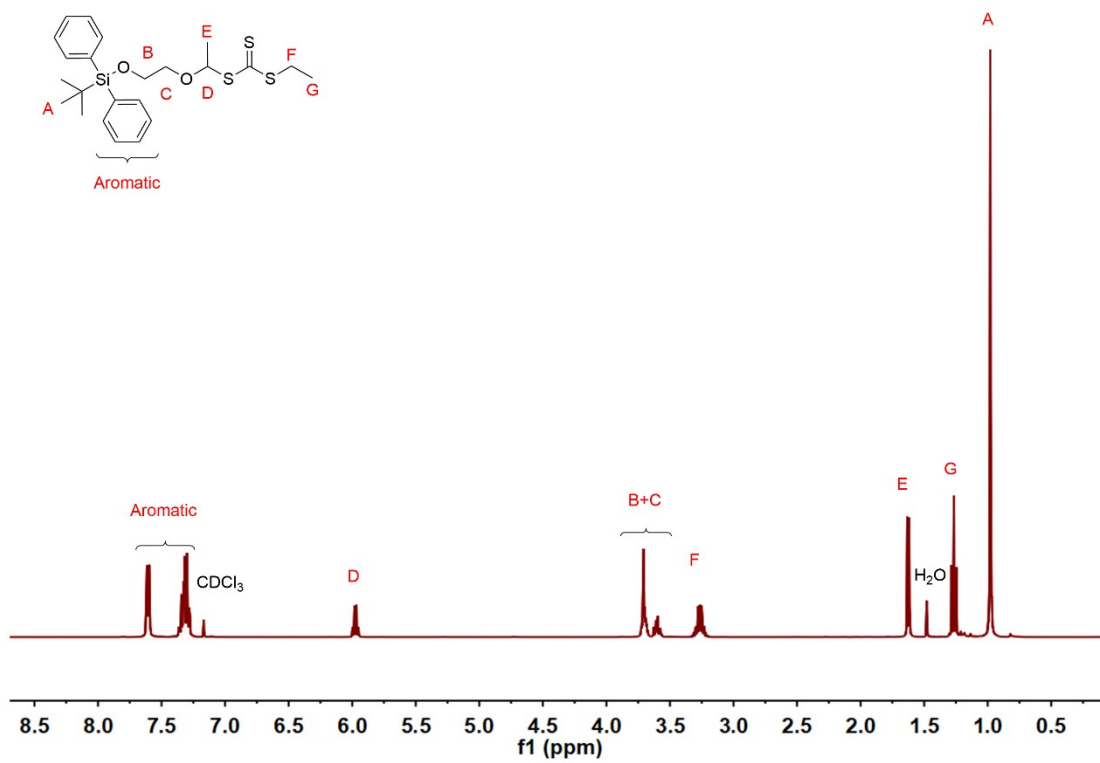

Figure S1. <sup>1</sup>H NMR spectrum (DMSO, 400 MHz) of PTRS

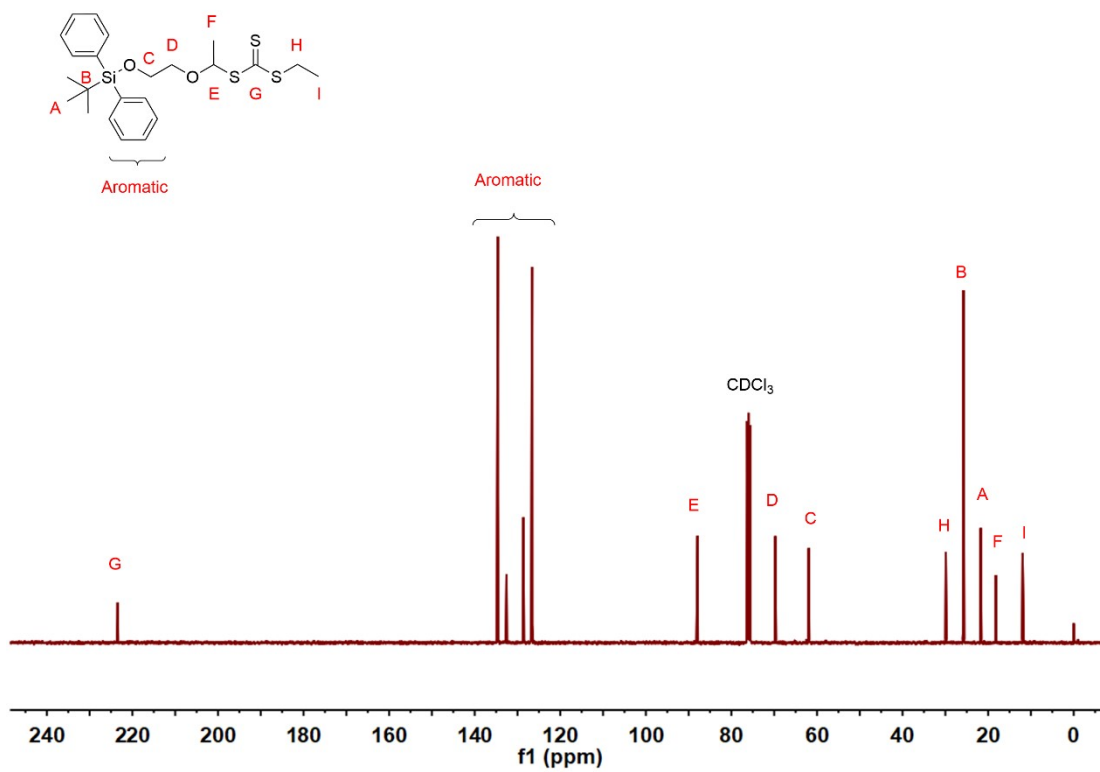

Figure S2.  $^{13}\text{C}$  NMR spectrum (DMSO, 100 MHz) of PTRA

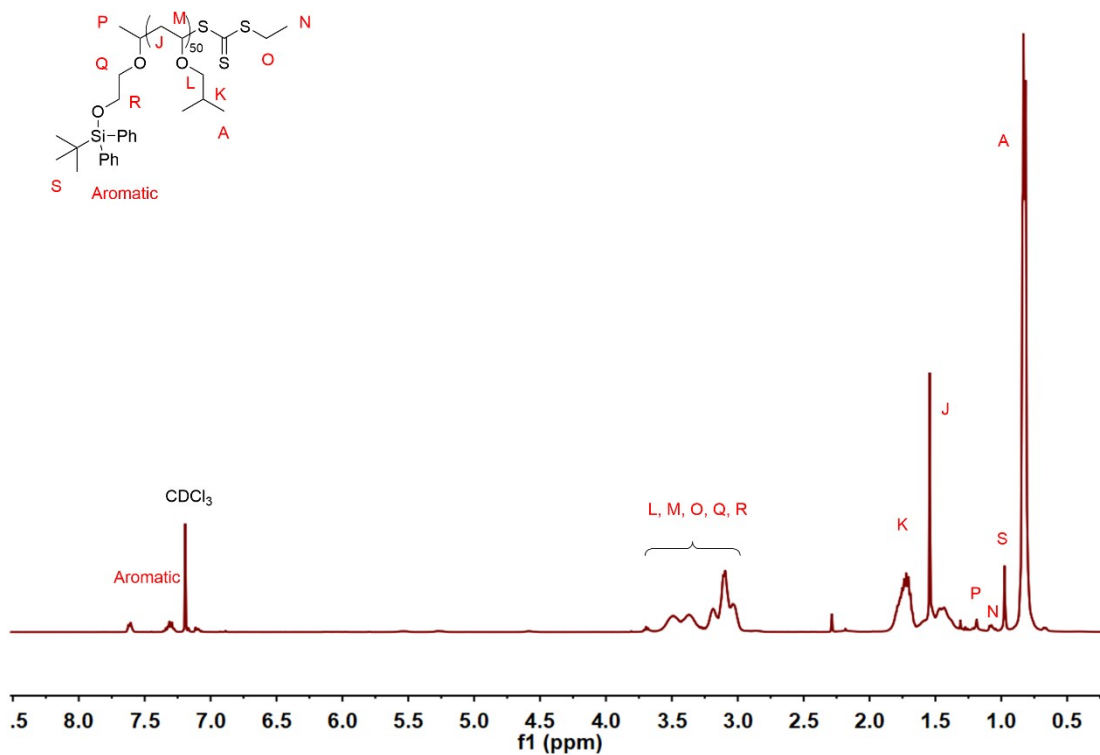

Figure S3. <sup>1</sup>H NMR spectrum (CDCl<sub>3</sub>, 400 MHz) of PIBVE

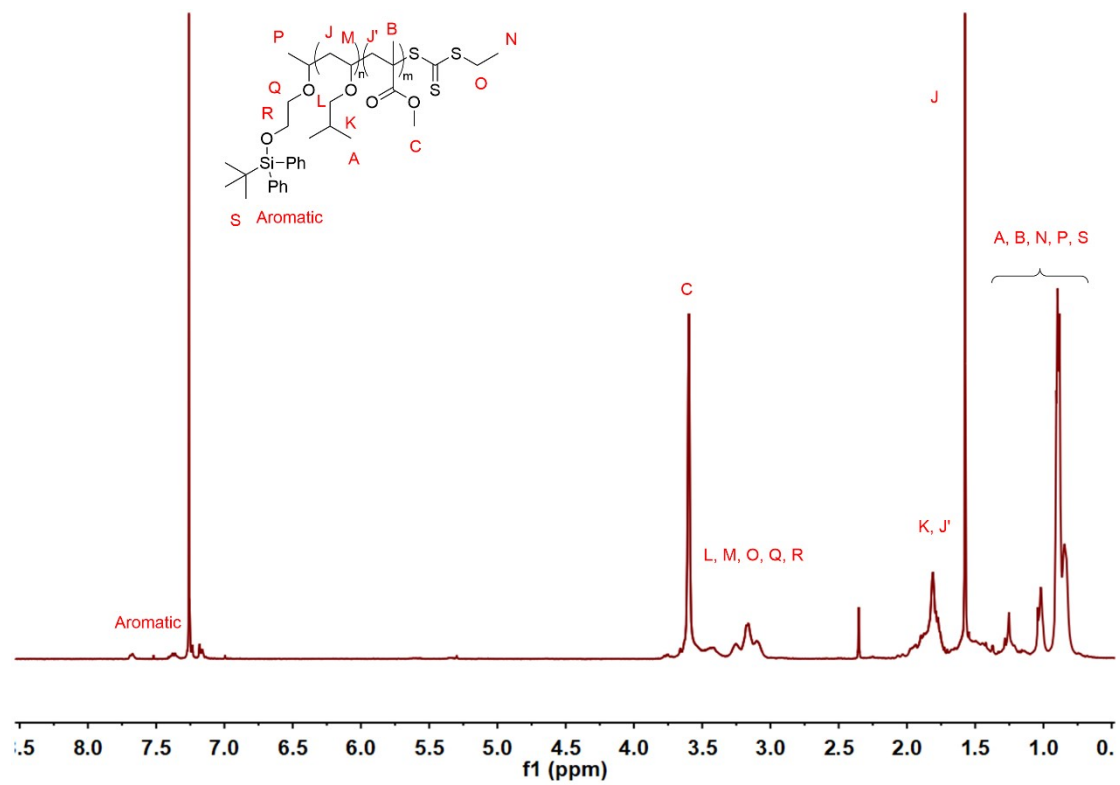

Figure S4. <sup>1</sup>H NMR spectrum (CDCl<sub>3</sub>, 400 MHz) of PIBVE-*b*-PMMA

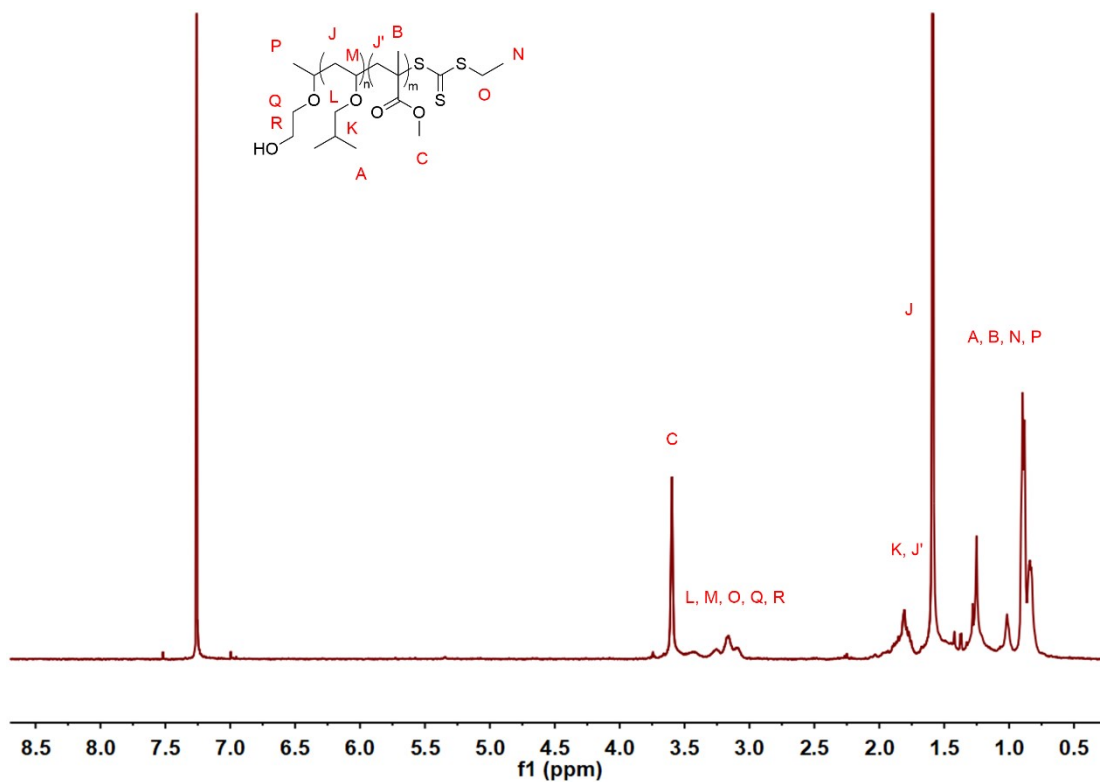

Figure S5. <sup>1</sup>H NMR spectrum (CDCl<sub>3</sub>, 400 MHz) of deprotected PIBVE-*b*-PMMA

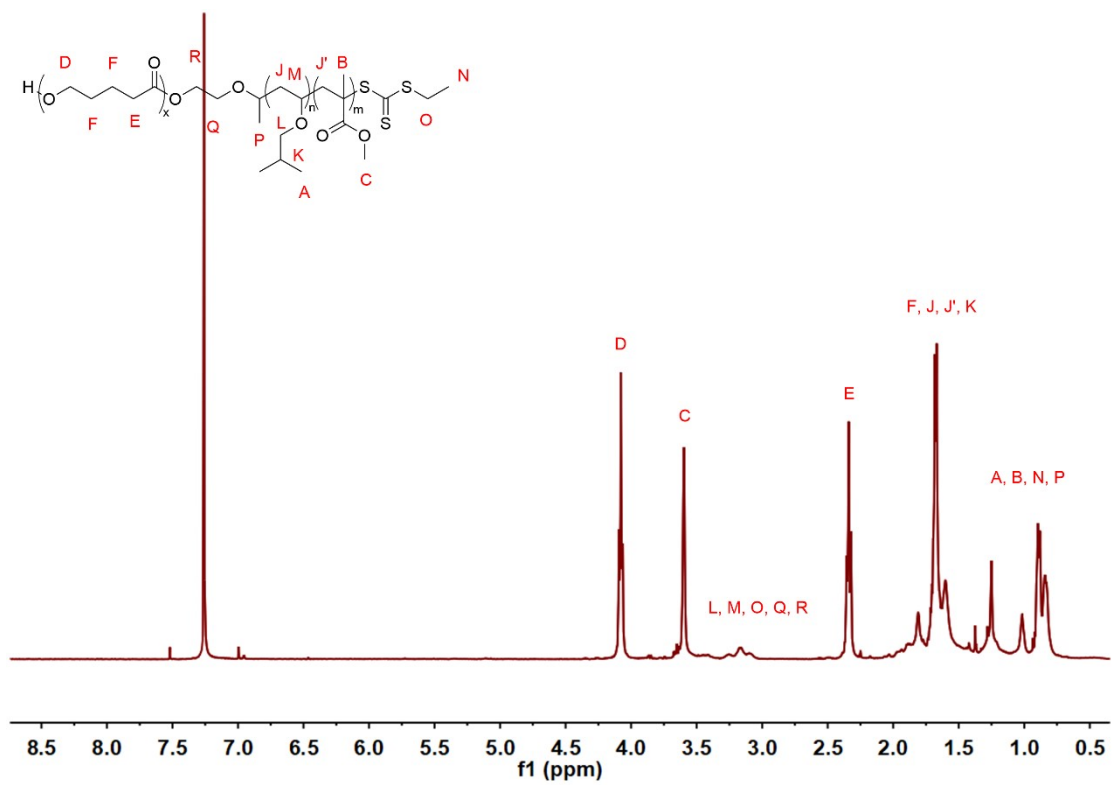

Figure S6. <sup>1</sup>H NMR spectrum (CDCl<sub>3</sub>, 400 MHz) of PIBVE-*b*-PMMA-*b*-PVL



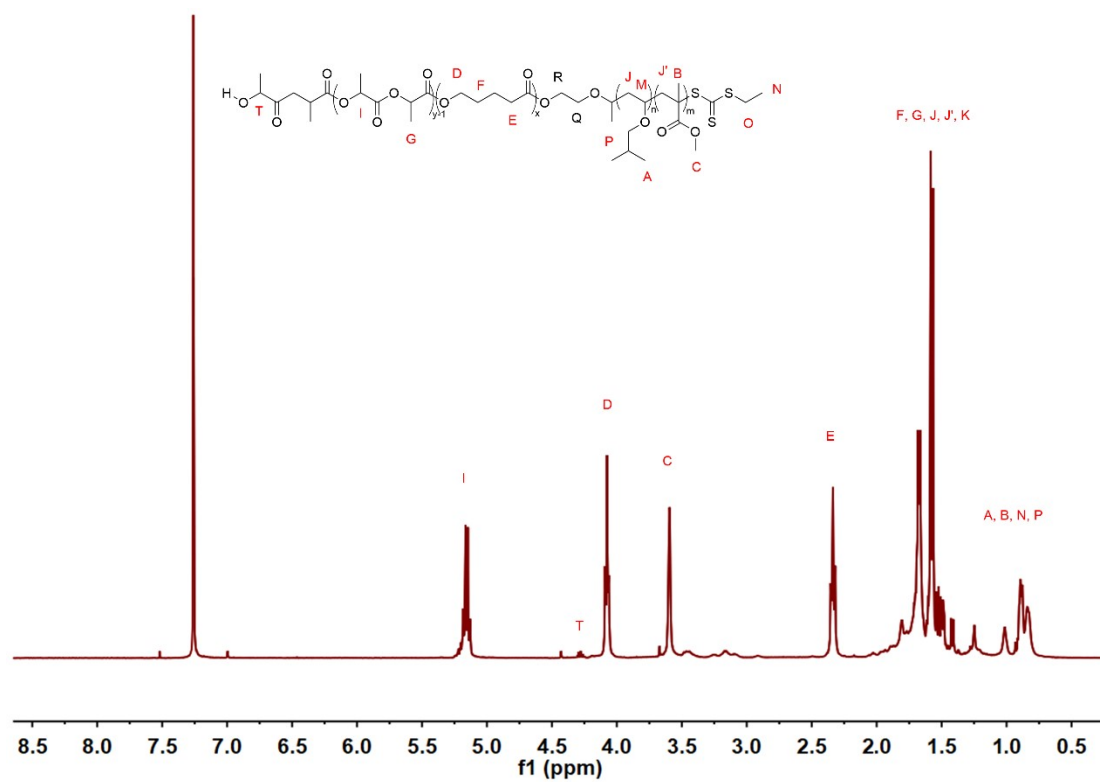

Figure S7. <sup>1</sup>H NMR spectrum (CDCl<sub>3</sub>, 400 MHz) of PIBVE-*b*-PMMA-*b*-PVL-*b*-PLLA

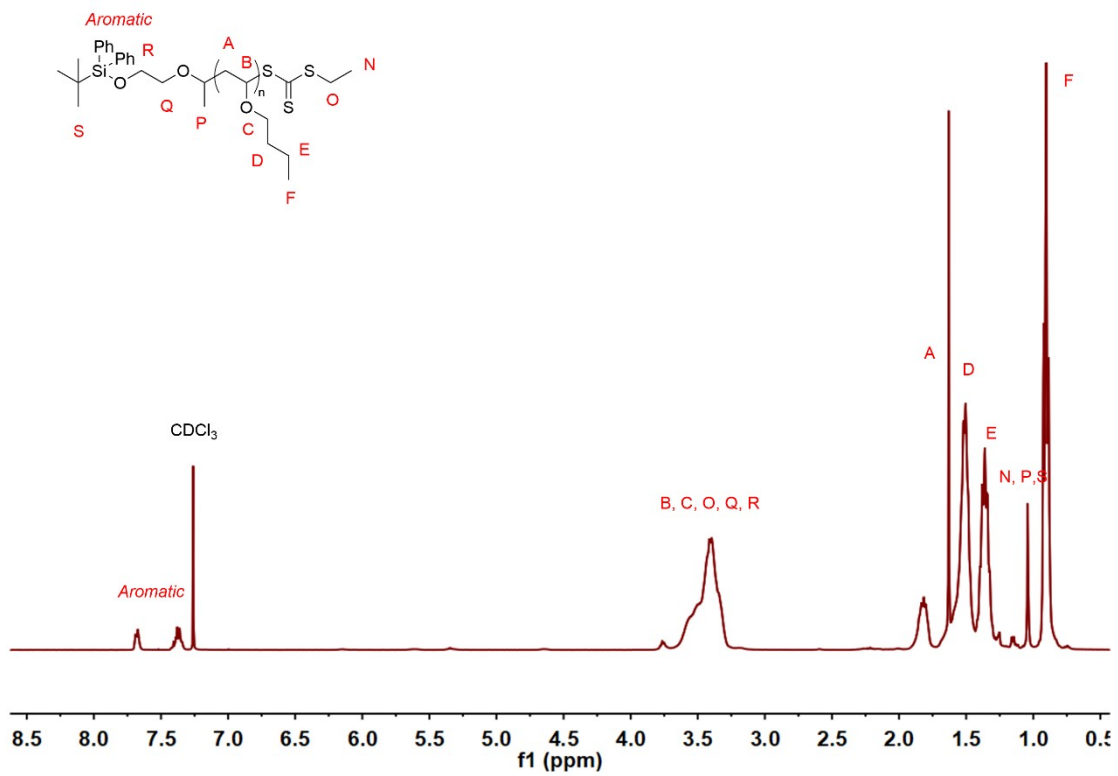

Figure S8. <sup>1</sup>H NMR spectrum (CDCl<sub>3</sub>, 400 MHz) of PBVE

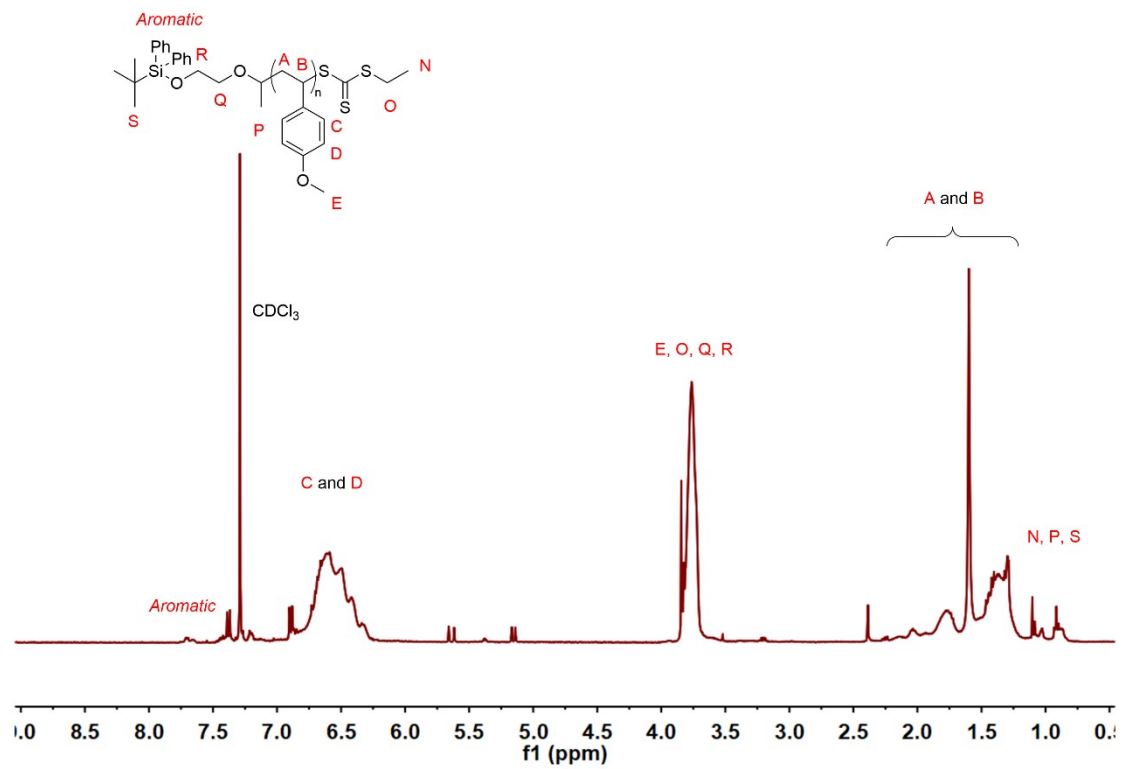

Figure S9. <sup>1</sup>H NMR spectrum (CDCl<sub>3</sub>, 400 MHz) of poly(4-methoxystyrene)

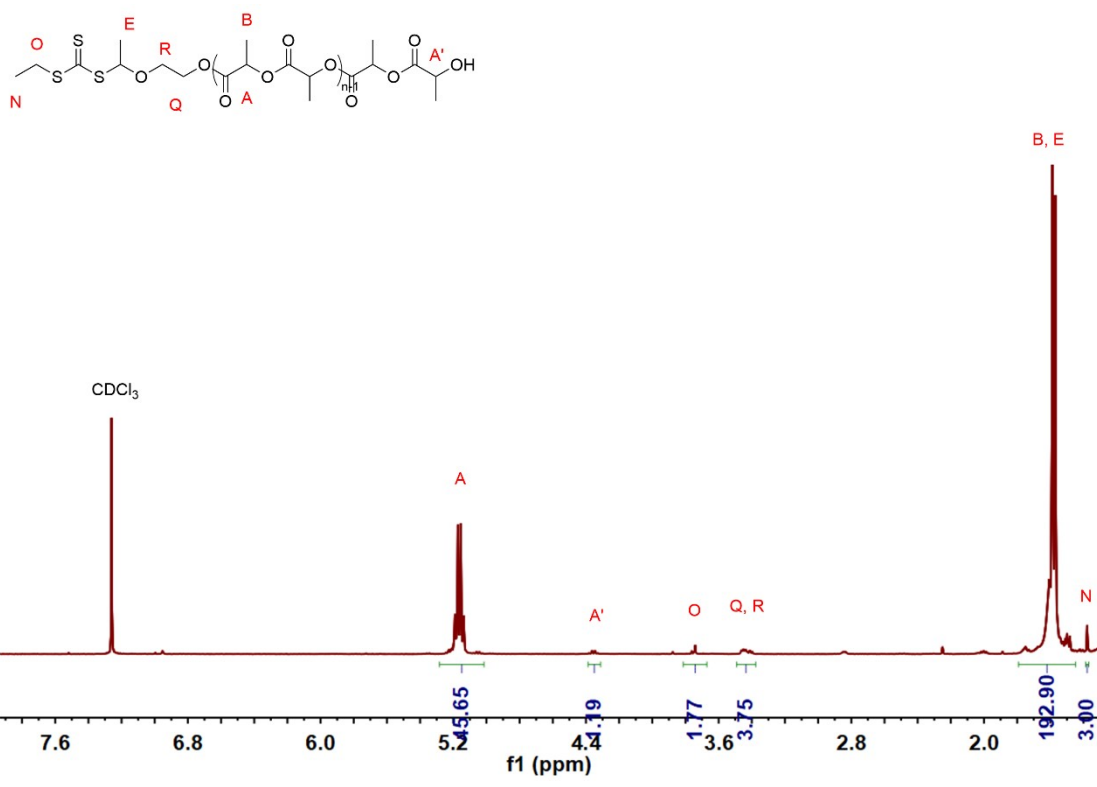

Figure S10. <sup>1</sup>H NMR spectrum (CDCl<sub>3</sub>, 400 MHz) of PLA.

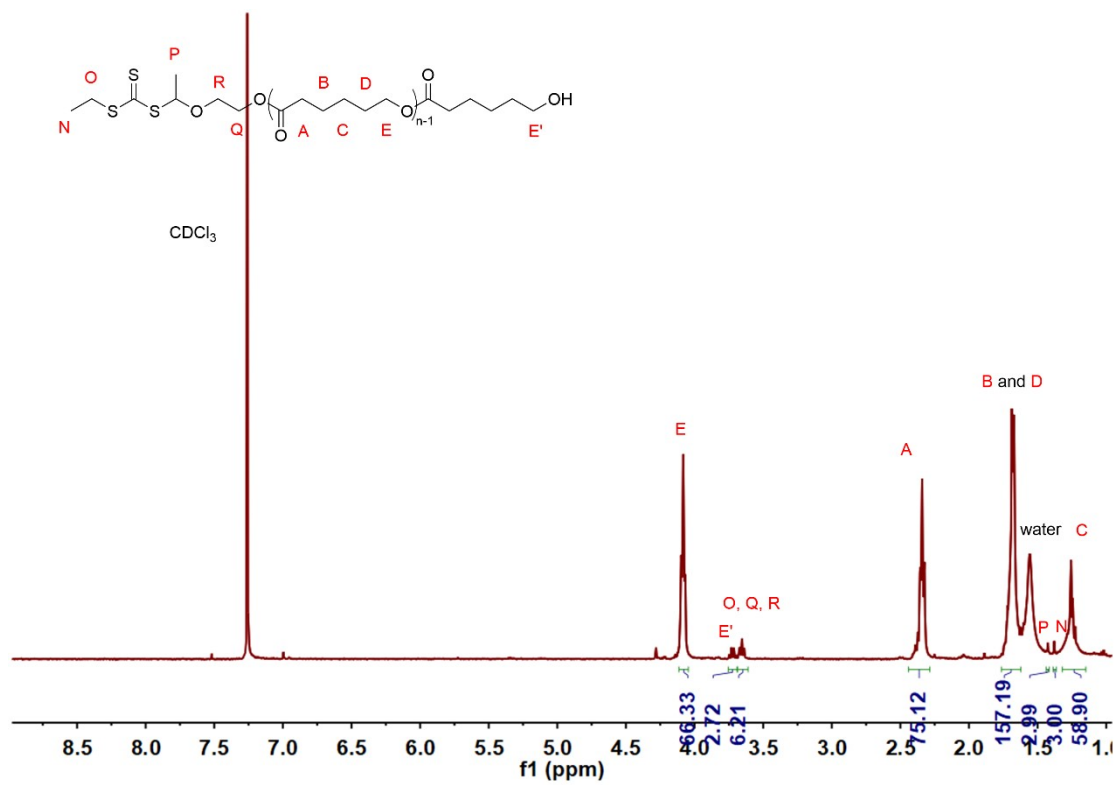

Figure S11.  $^1\text{H}$  NMR spectrum ( $\text{CDCl}_3$ , 400 MHz) of PCL.

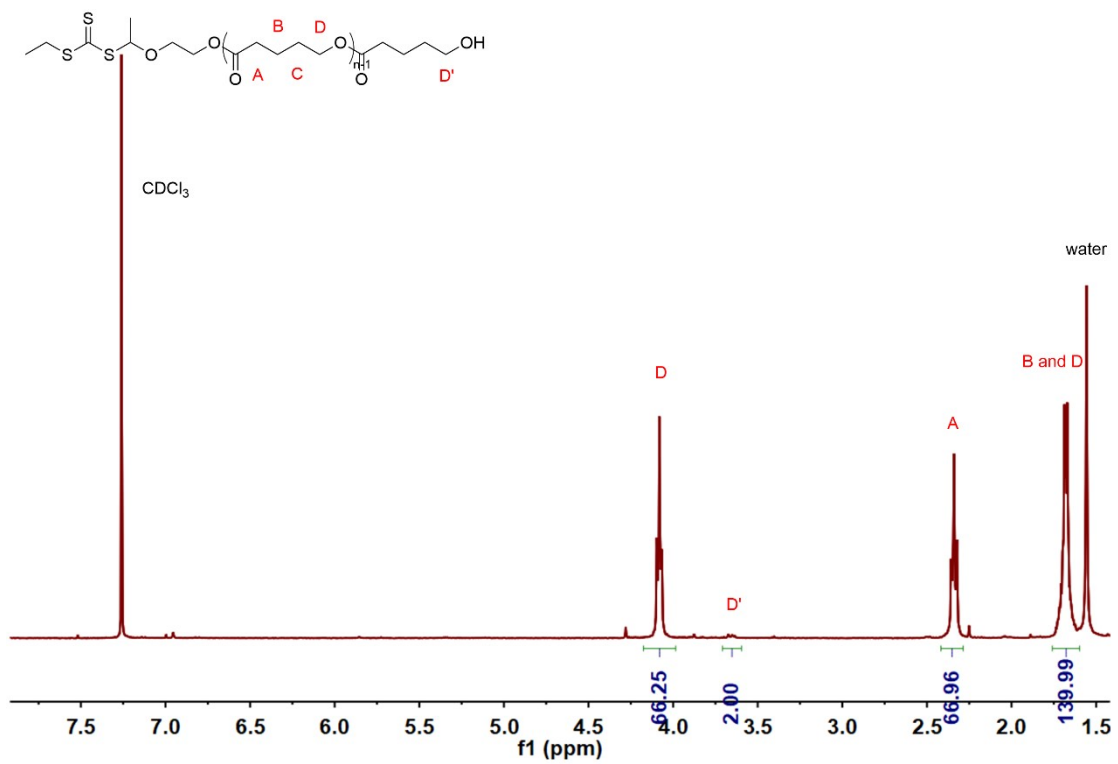

Figure S12. <sup>1</sup>H NMR spectrum (CDCl<sub>3</sub>, 400 MHz) of PVL.

Cationic RAFT → Deprotection → ROP

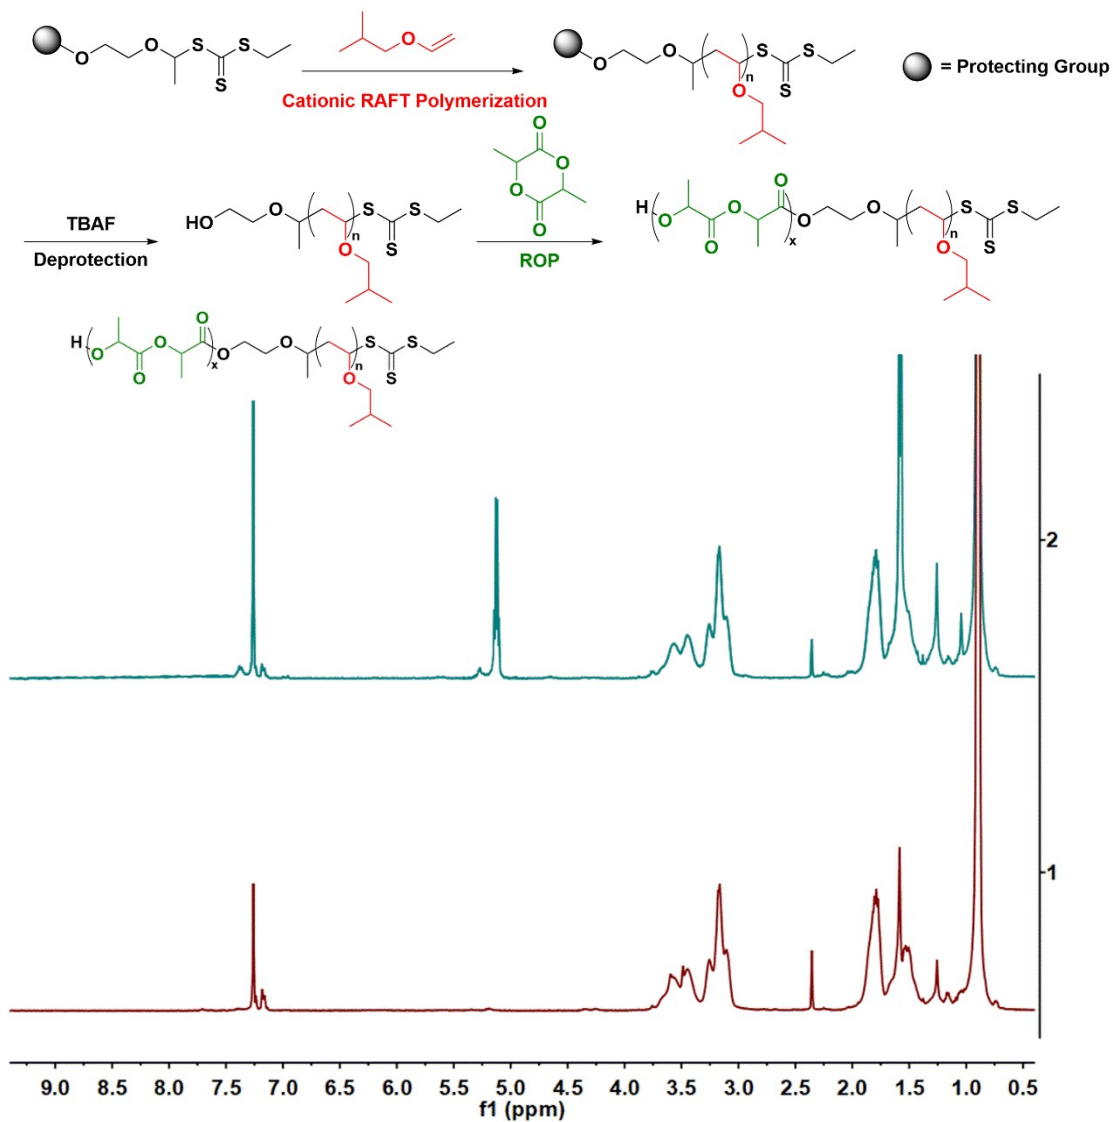

Figure S13. Merging of cationic RAFT polymerization and ring-opening polymerization for preparing PIBVE-*b*-PLLA

Radical RAFT → Deprotection → ROP

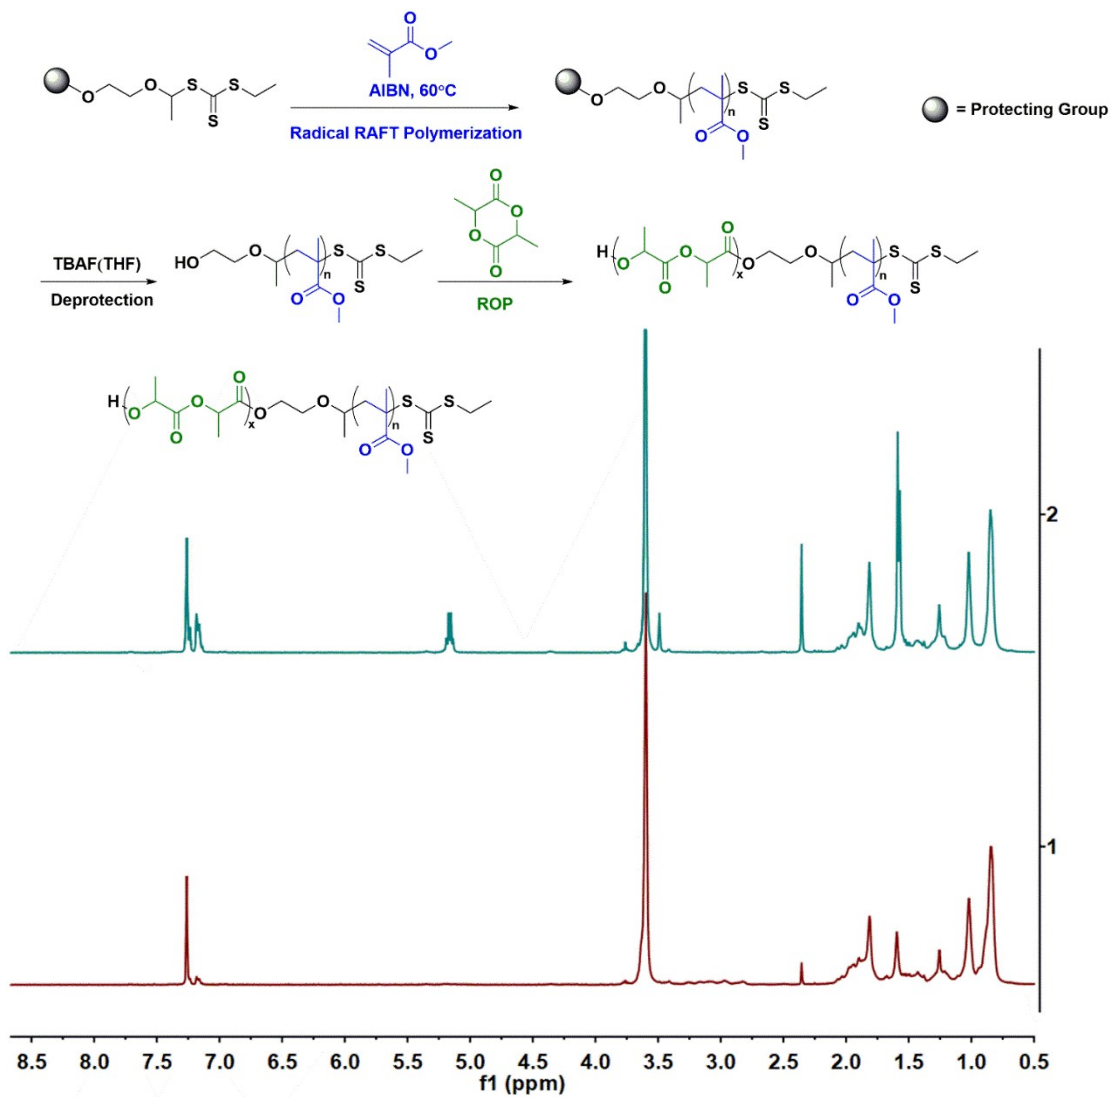

Figure S14. Merging of radical RAFT polymerization ( $M_{n,NMR} = 3.4$ ,  $D = 1.17$ ) and ring-opening polymerization for preparing PMMA-*b*-PLLA ( $M_{n,NMR} = 7.9$ ,  $D = 1.24$ )



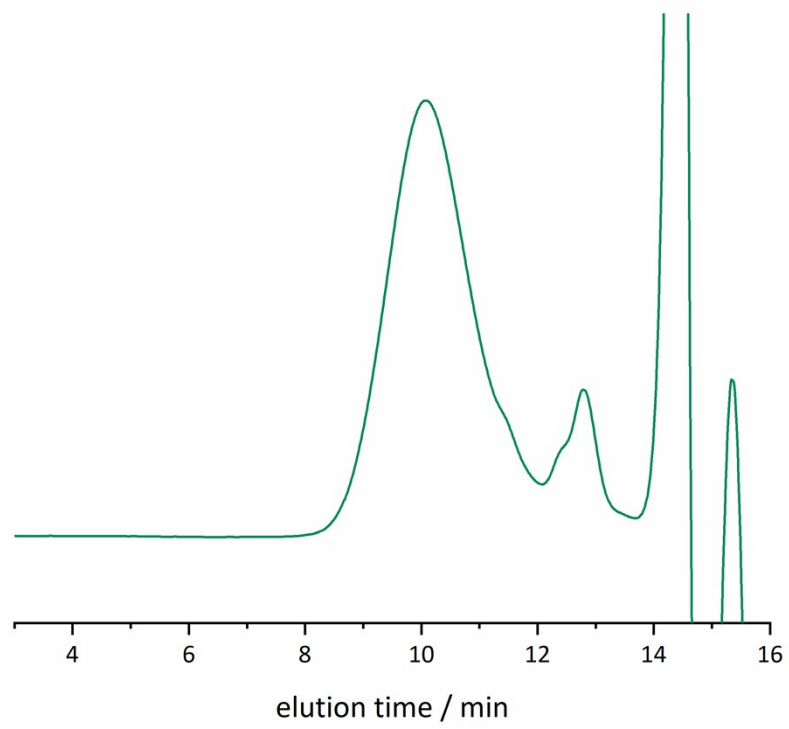

Figure S15. SEC traces of PIBVE

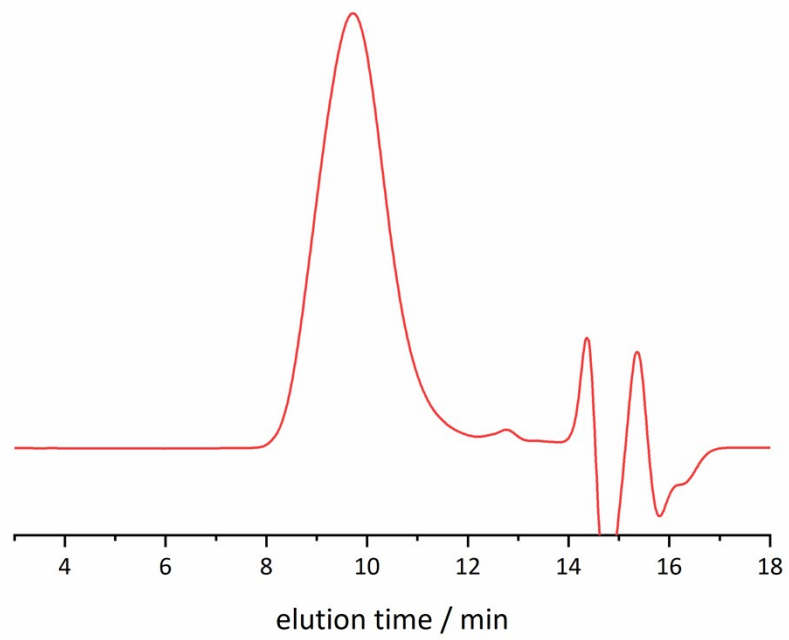

Figure S16. SEC traces of PIBVE-*b*-PMMA

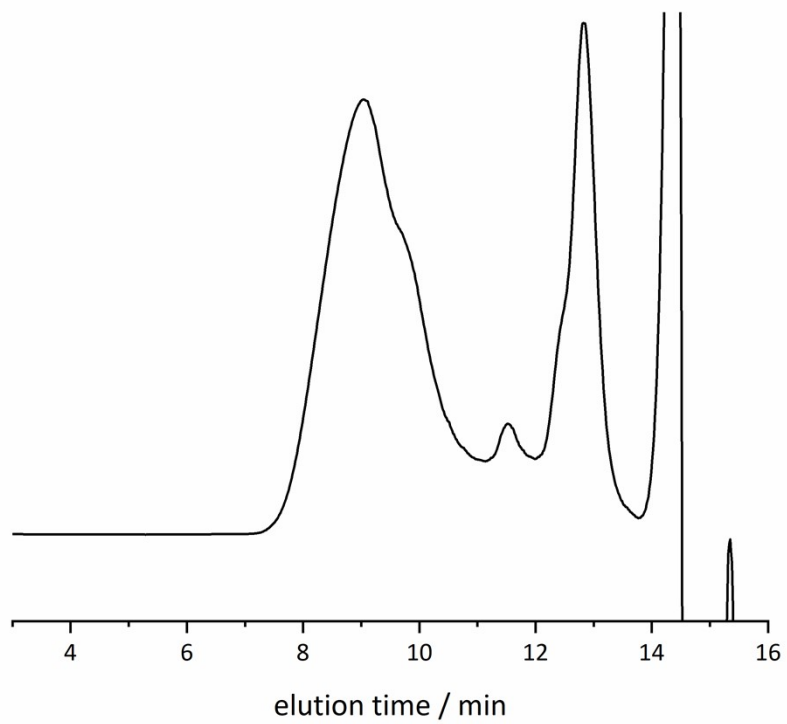

Figure S17. SEC traces of PIBVE-*b*-PMMA-*b*-PVL

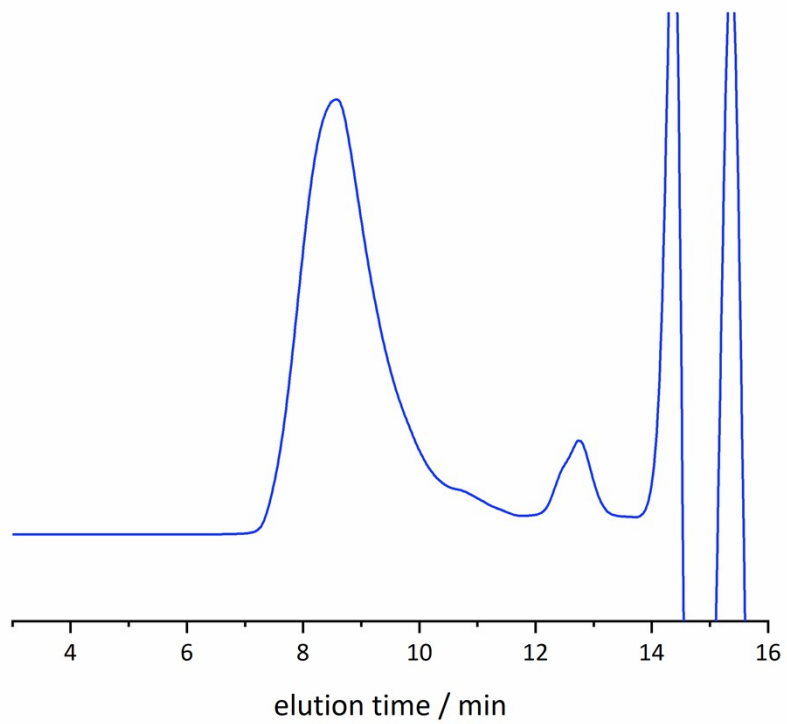

Figure S18. SEC traces of PIBVE-*b*-PMMA-*b*-PVL-*b*-PLA

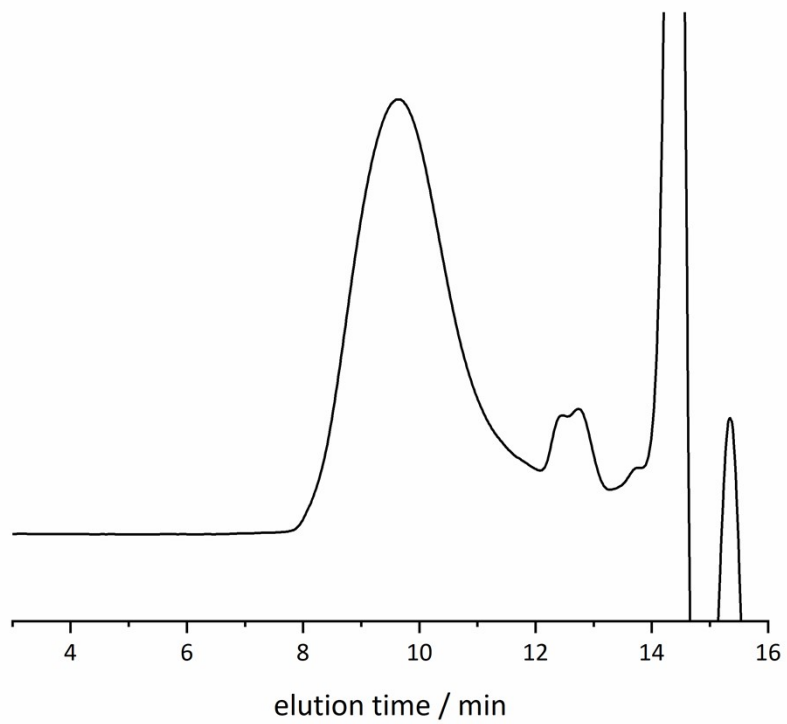

Figure S19. SEC traces of PIBVE-*b*-PLA

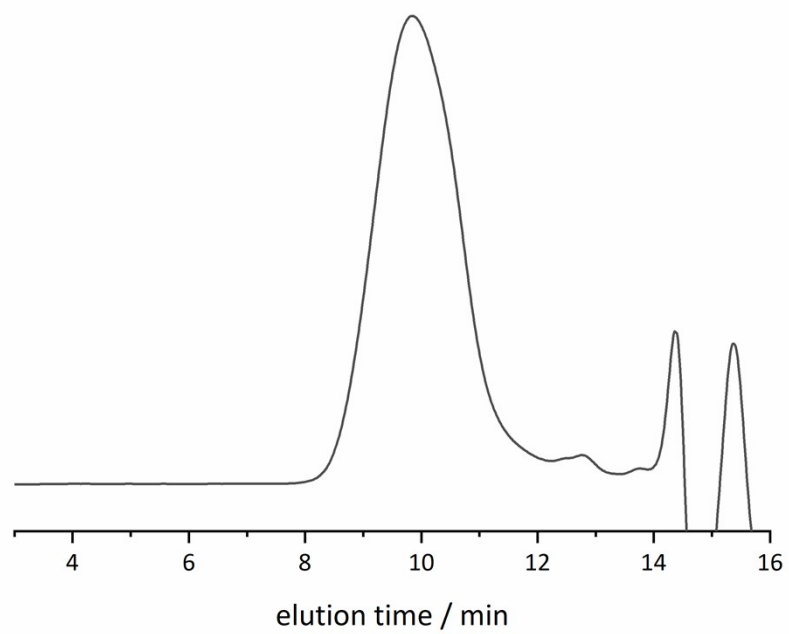

Figure S20. SEC traces of PMMA-*b*-PLA

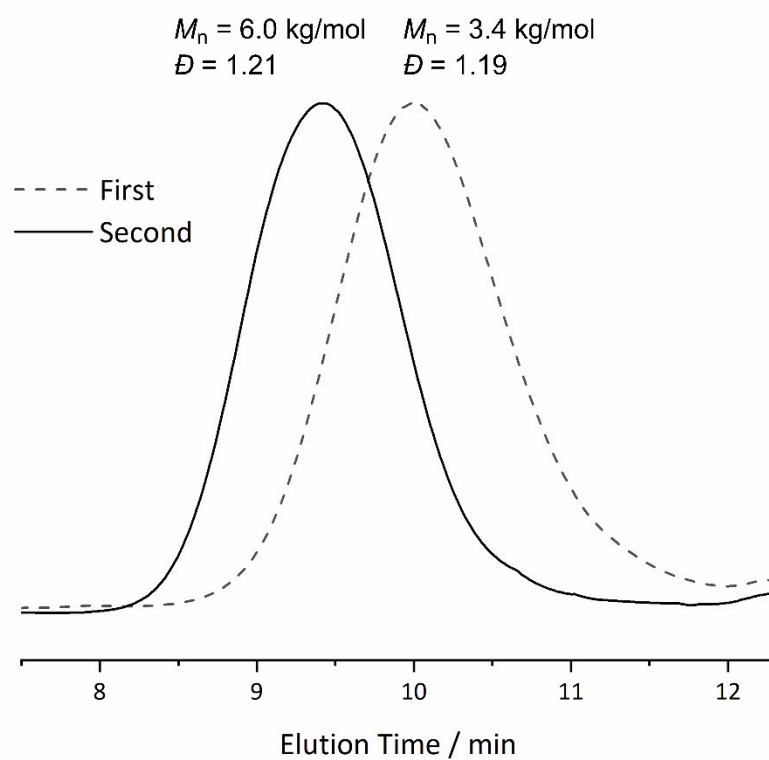

Figure S21. SEC traces of first polylactide and post-polymerization (dashed and solid line respectively) (eluent, THF; flow rate,  $0.7 \text{ ml min}^{-1}$ ).

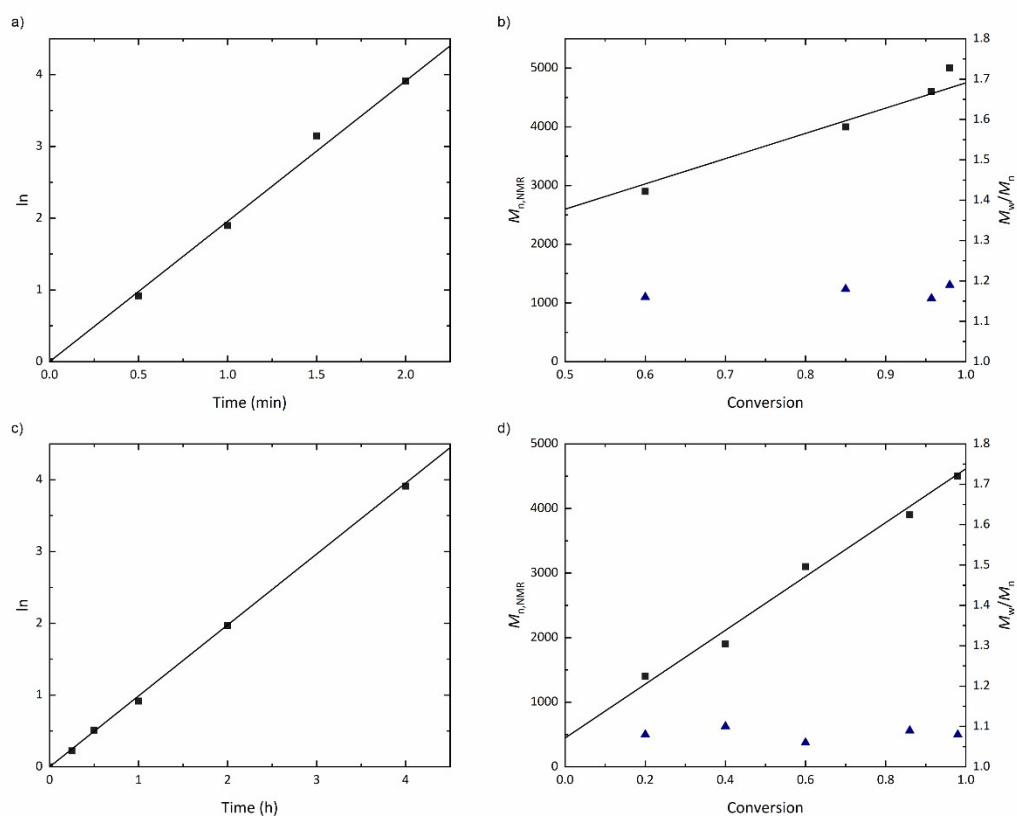

Figure S22 (a) The semi-logarithmic kinetics plot for poly(isobutyl vinyl ether) (PIBVE) ( $[IBVE]_0/[RAFT\ agent]_0 = 40/1$ , toluene,  $-40\ ^\circ C$ ). (c) The semi-logarithmic kinetics plot for polylactide (PLA) ( $[LA]_0/[deprotected\ RAFT\ agent]_0 = 30/1$ , toluene, room temperature). (b, d) Plots of molecular weight ( $M_{n,NMR}$ ) and dispersities ( $\bar{D}$ ) versus the monomer conversion.



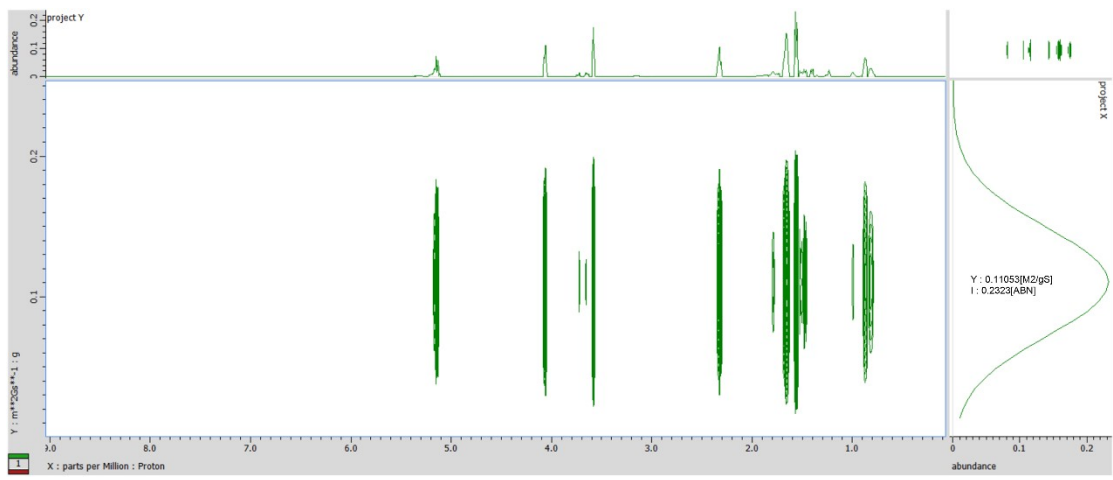

Figure S23. DOSY NMR spectrum ( $\text{CDCl}_3$ ) of PIBVE-*b*-PMMA-*b*-PVL-*b*-PLLA.

Table S1. The effect of TABF and chlorosilane on the ROPs<sup>a</sup>

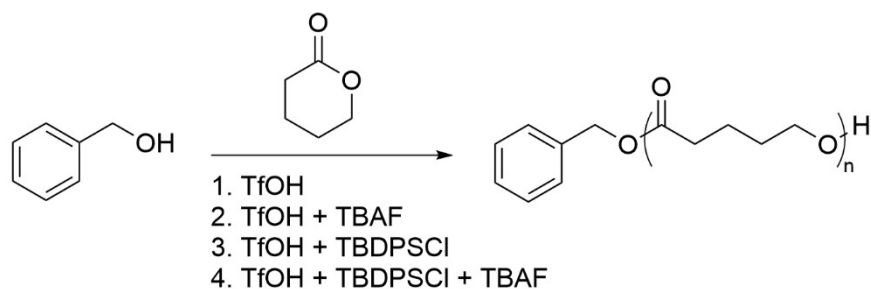

| Entry | Additives        | $[M]_0/[I]_0/[C]_0/[A]_0$ | Conv. <sup>b</sup> (%) | $M_{n,th}^c$ (kg mol <sup>-1</sup> ) | $M_{n,NMR}^b$ (kg mol <sup>-1</sup> ) | $M_{n,GPC}^d$ (kg mol <sup>-1</sup> ) | $\bar{D}^d$ |
|-------|------------------|---------------------------|------------------------|--------------------------------------|---------------------------------------|---------------------------------------|-------------|
| 1     | -                | 30/1/1/0                  | 95                     | 3.0                                  | 3.1                                   | 2.9                                   | 1.14        |
| 2     | TBAF             | 30/1/2/1                  | 96                     | 3.0                                  | 2.8                                   | 2.5                                   | 1.16        |
| 3     | TBDPSCI          | 30/1/1/1                  | 96                     | 3.0                                  | 3.0                                   | 2.9                                   | 1.09        |
| 4     | TBAF and TBDPSCI | 30/1/2/1/1                | 96                     | 3.0                                  | 3.0                                   | 2.9                                   | 1.15        |

<sup>a</sup> Reaction conditions: benzylalcohol (I, 1 equiv), VL (M, 30 equiv), 4 hours; ring-opening polymerizations processed in toluene at room temperature. <sup>b</sup> Determined by <sup>1</sup>H NMR in CDCl<sub>3</sub>. <sup>c</sup> Calculated from  $([M]_0/[I]_0) \times \text{conv.} \times (M_w \text{ of M}) + (M_w \text{ of I})$ . Theoretical molecular weight (full conversions) of PVL is about 3.1 kg mol<sup>-1</sup>. <sup>d</sup> Determined by GPC in THF using PSt Standards and correction factors.
